# Supplementary material for: Growth cone advance requires EB1 as revealed by genomic replacement with a light-sensitive variant
Source: eLife journal article supplement (doi:10.7554/elife.84143), 2023-01-30

**Figure 1C - source data**

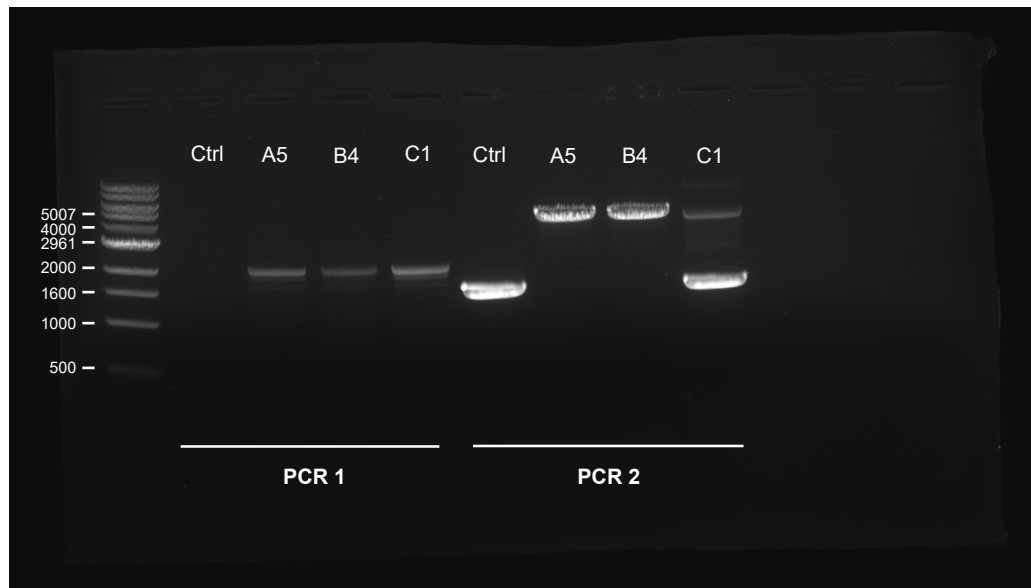

Note: C1 is a not fully edited (heterozygous?) clone that we did not further characterize, and is not included in the main figure.

Figure 1D - source data

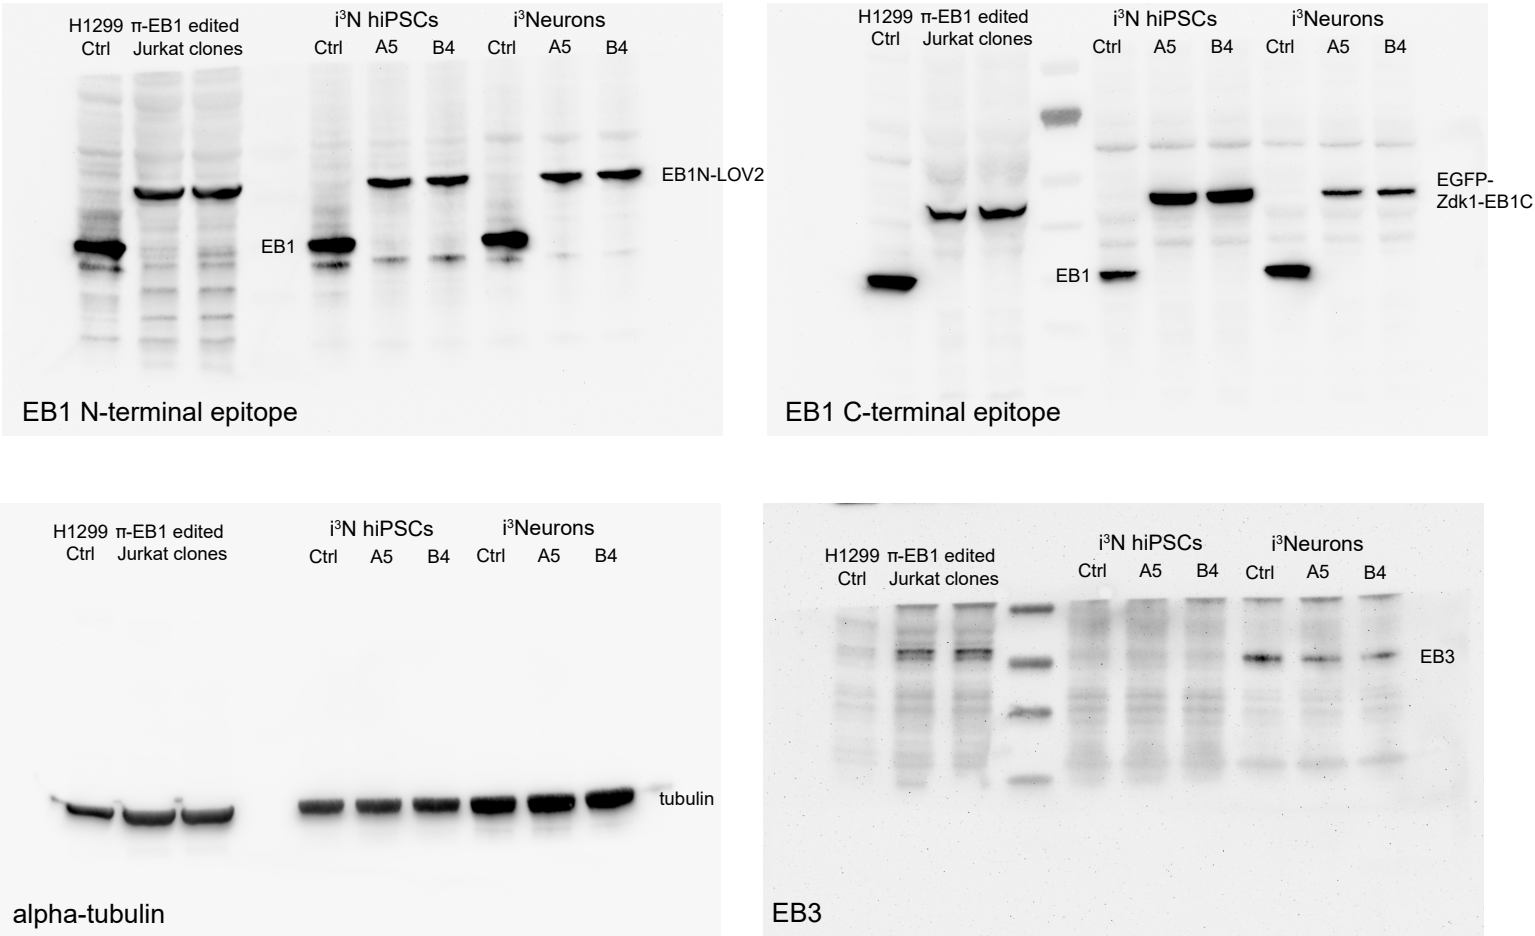

Figure 1H - source data

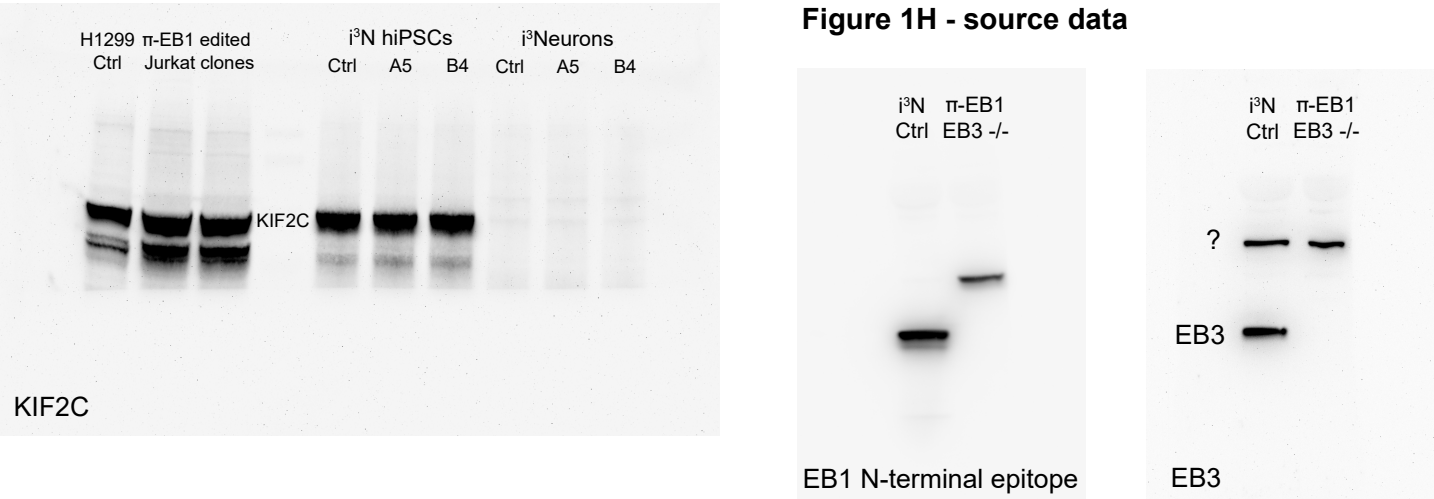

Supplement: supp [file elife-84143-supp-v1.zip]
