# Supplementary figures and images for: Growth cone advance requires EB1 as revealed by genomic replacement with a light-sensitive variant
Source: eLife journal article supplement (doi:10.7554/elife.84143), 2023-01-30

**Figure 1 supplement 3 - source data**

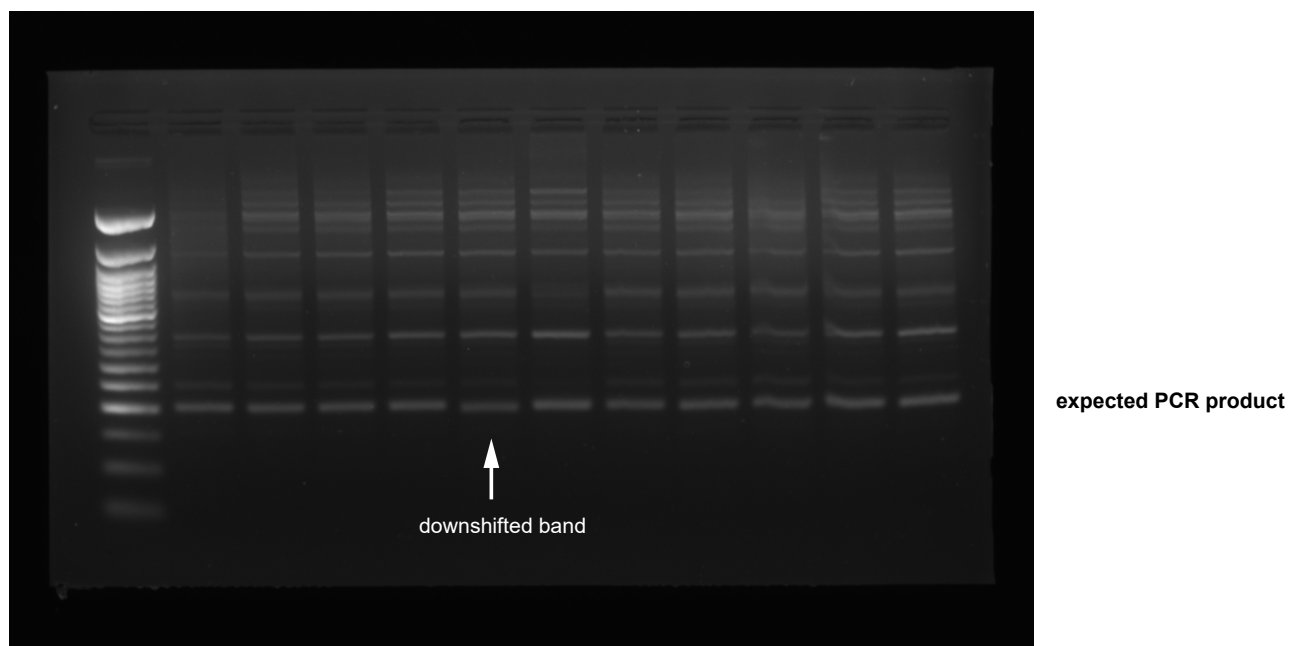

Supplement: supp [file elife-84143-supp-v1.zip]

Figure 1 supplement 1 - source data

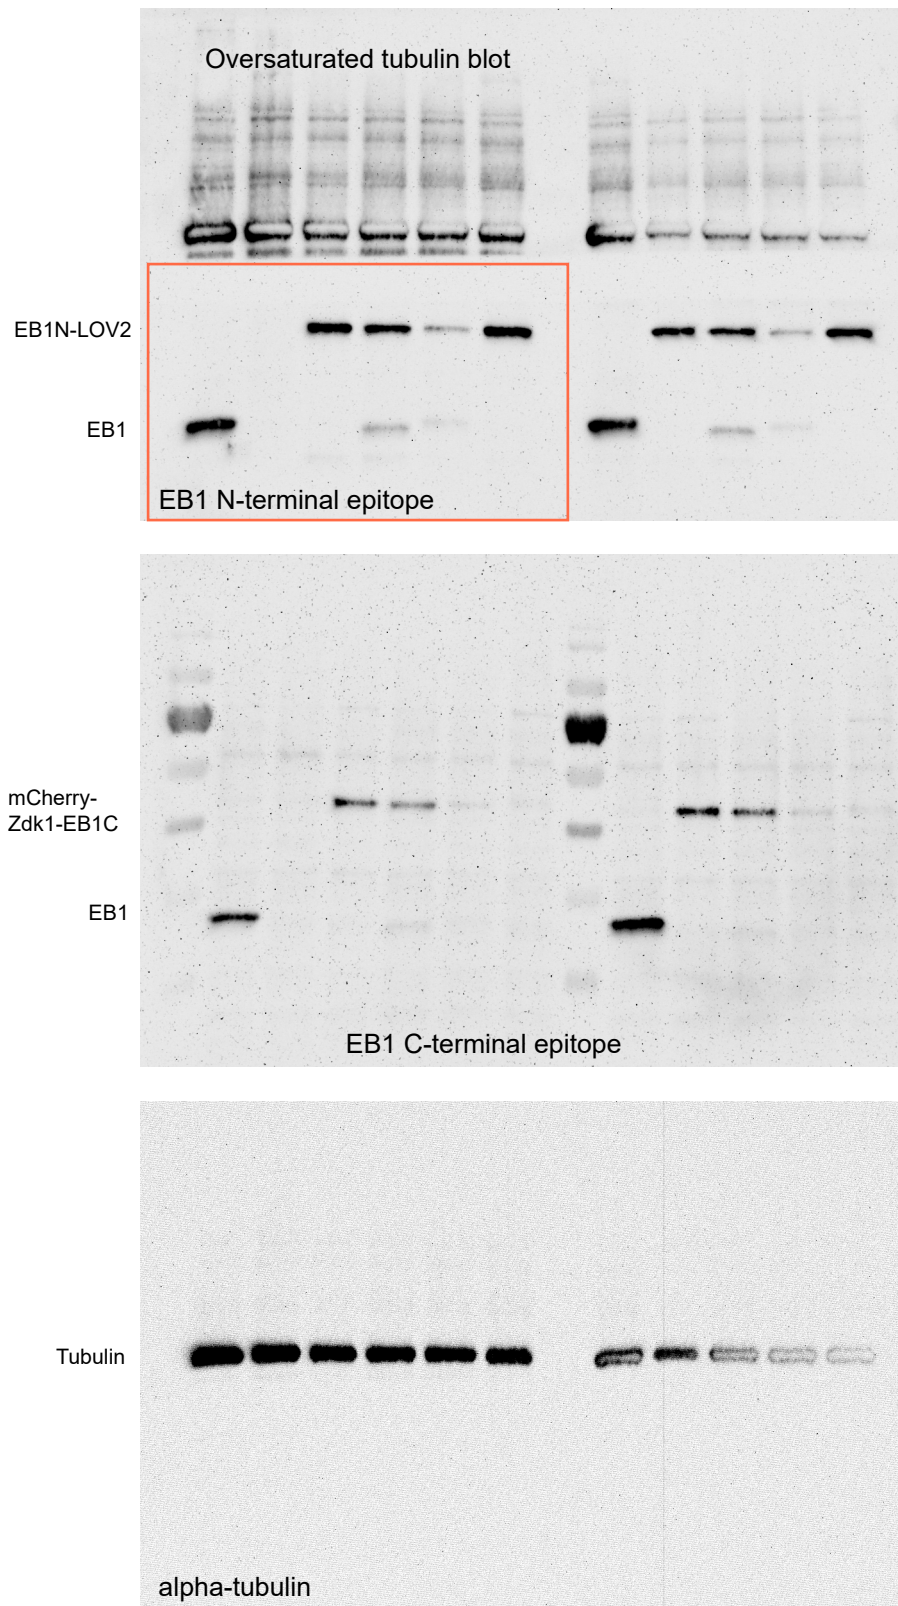

Figure 1 supplement 1 - source data

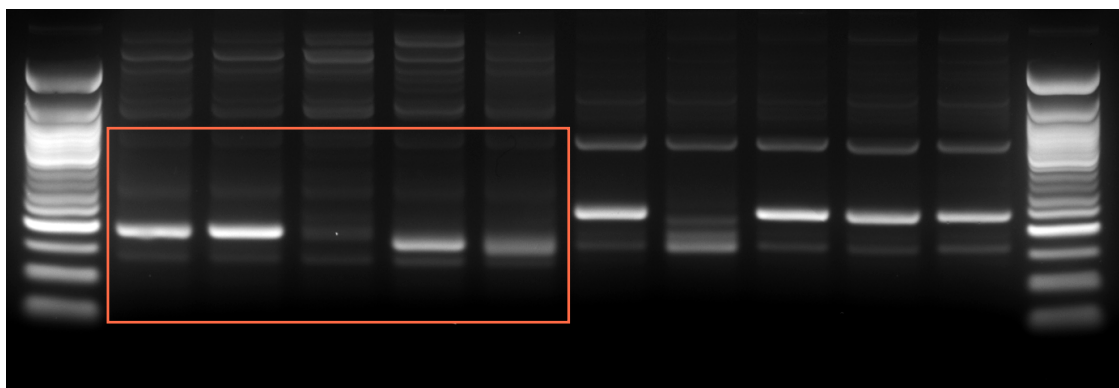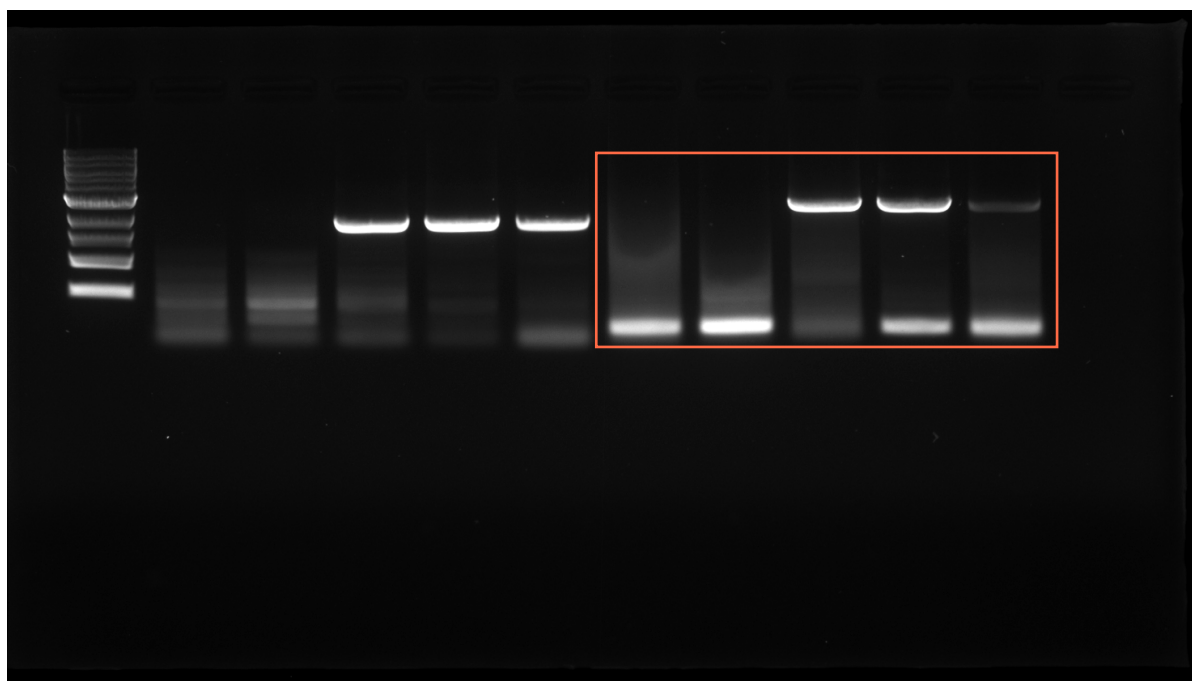

Supplement: supp [file elife-84143-supp-v1.zip]
